# Supplementary material for: Characterization of Antioxidant and α-Glucosidase Inhibitory Compounds of Cratoxylum formosum ssp. pruniflorum and Optimization of Extraction Condition
Source: MDPI journal article supplement (doi:10.3390/antiox12020511), 2023-02-17
Supplement: s1 [file s1]

**Characterization of antioxidant and  $\alpha$ -glucosidase inhibitory  
compounds of *Cratoxylum formosum* ssp. *pruniflorum* and  
optimization of extraction condition**

**Hee Won Ahn <sup>1</sup>, Le Nguyen Thanh <sup>2</sup>, Le Quoc Khanh <sup>3</sup>, Se Hwan Ryu <sup>1</sup>, Solip Lee <sup>1</sup>,  
Sang Won Yeon <sup>1</sup>, Hak Hyun Lee <sup>1</sup>, Ayman Turk <sup>1</sup>, Ki Yong Lee <sup>4</sup>, Bang Yeon Hwang <sup>1</sup>  
and Mi Kyeong Lee <sup>1,\*</sup>**

<sup>1</sup>College of Pharmacy, Chungbuk National University, Cheongju 28160, Republic of Korea

<sup>2</sup>Department of Medicinal Chemistry Technology, Institute of Marine Biochemistry, Vietnam  
Academy of Science & Technology, Hanoi, 10000, Vietnam

<sup>3</sup>Hatinh Pharmaceutical Company (HADIPHAR), Hatinh 45000, Vietnam

<sup>4</sup>College of Pharmacy, Korea University, Sejong 47236, Republic of Korea

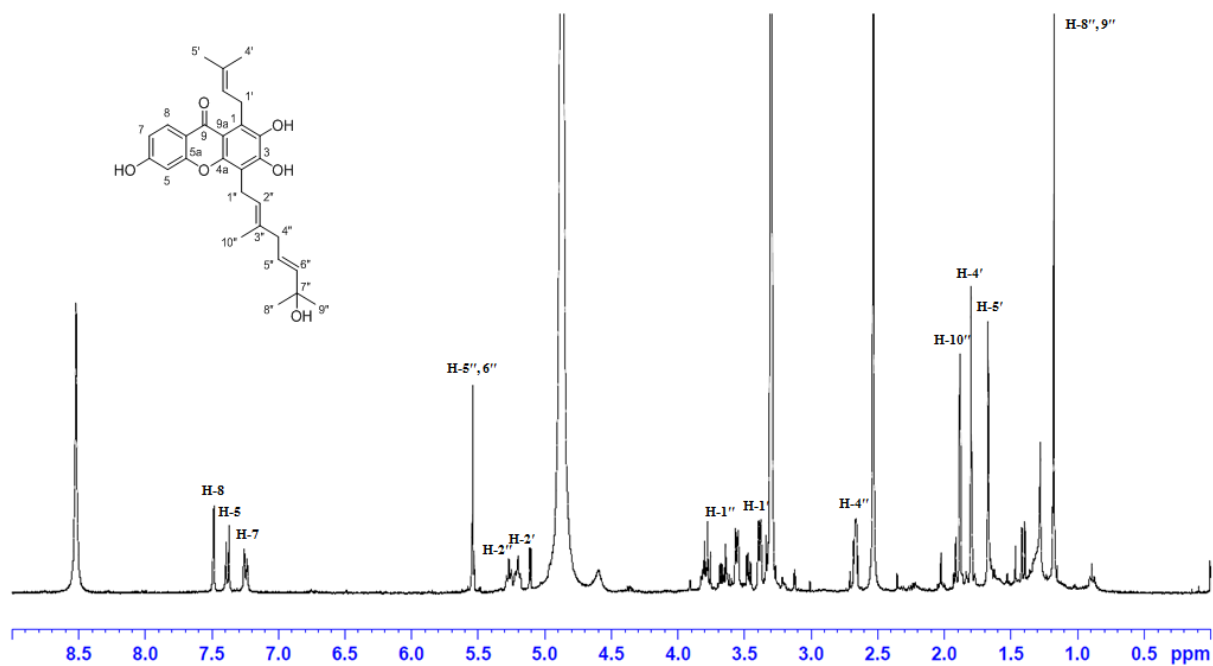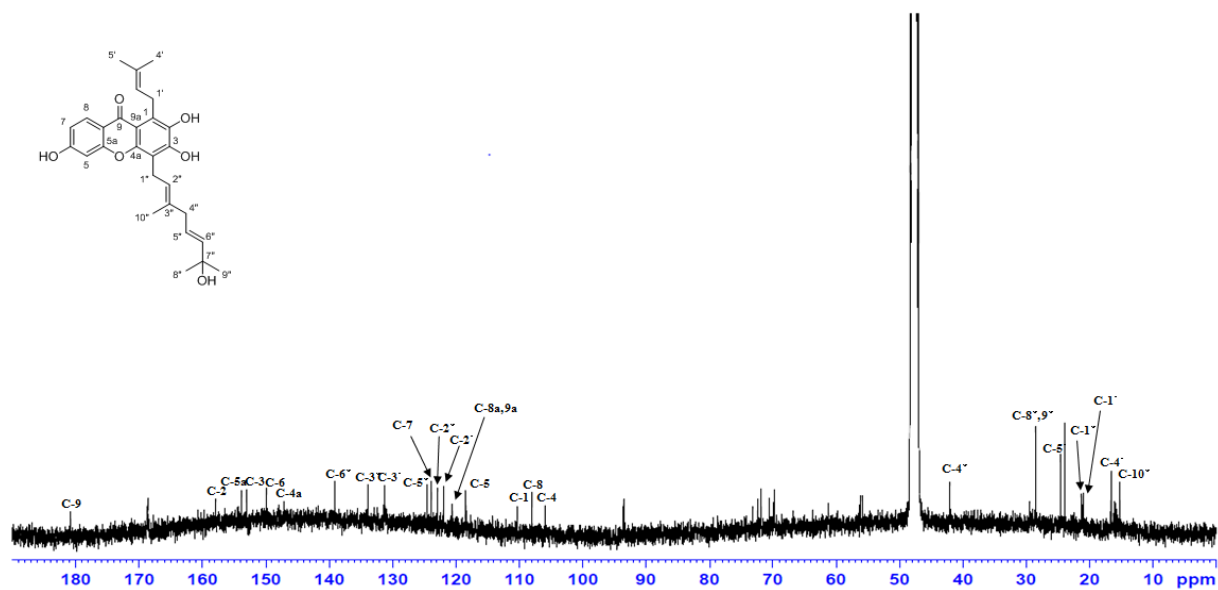

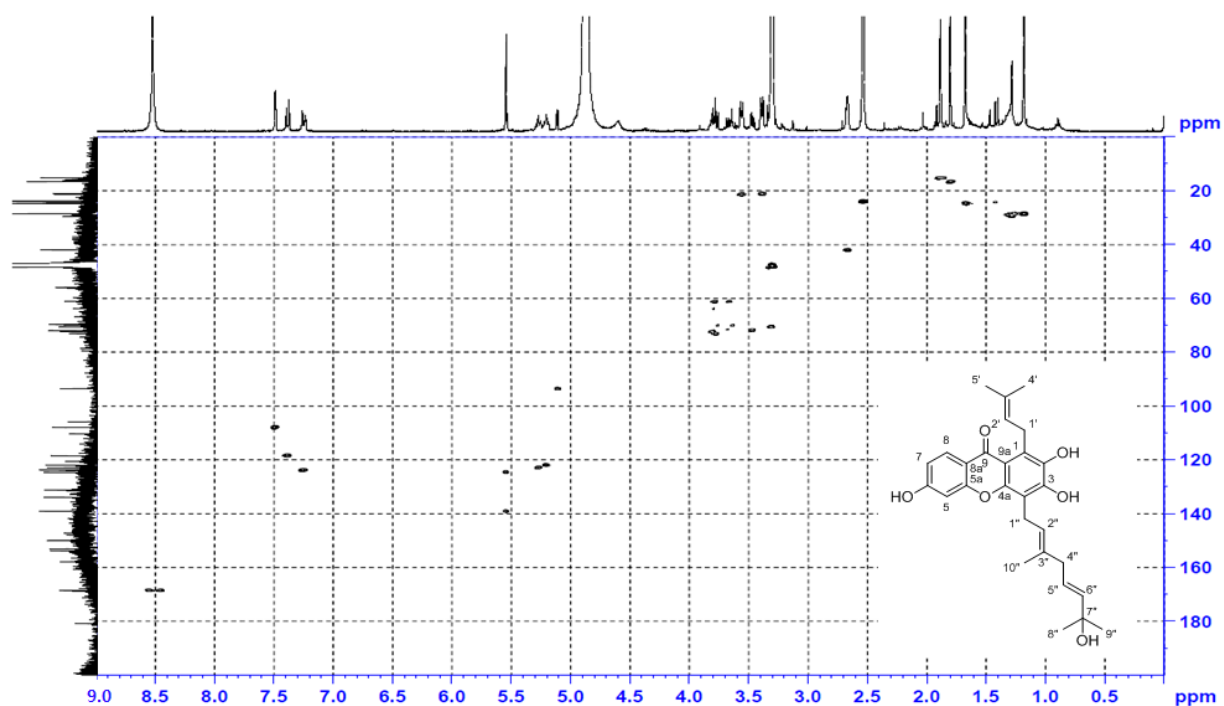

Figure S3. HSQC spectrum of compound **16**.

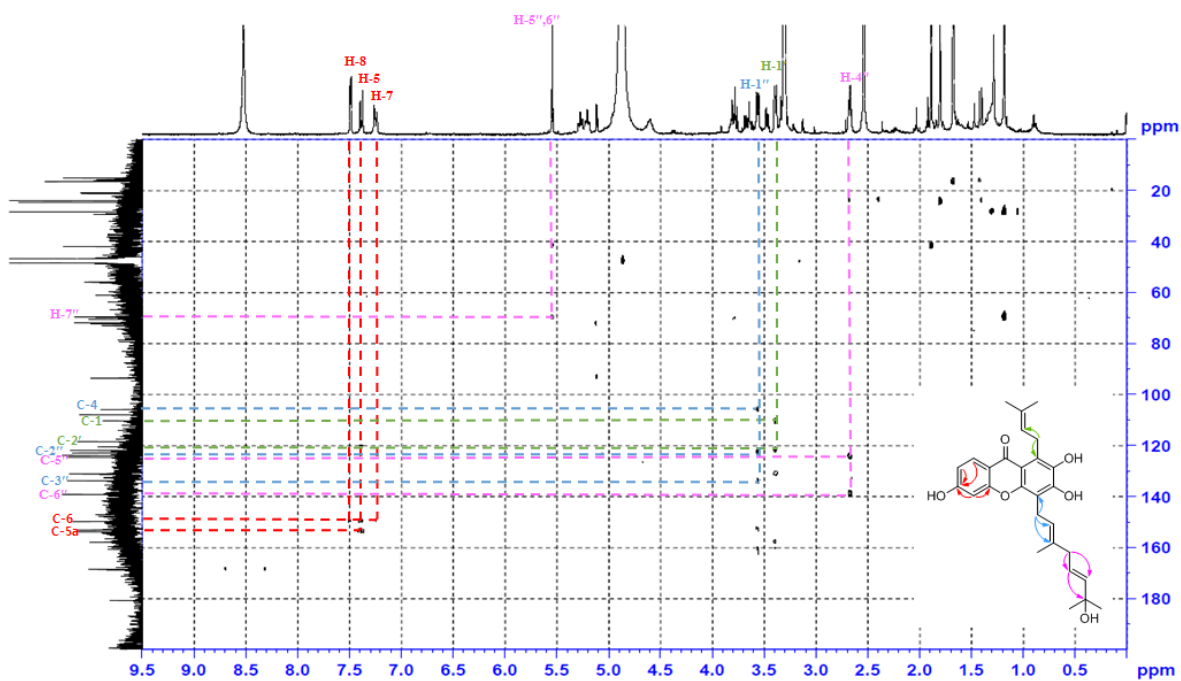

Figure S4. HMBC spectrum of compound **16**.

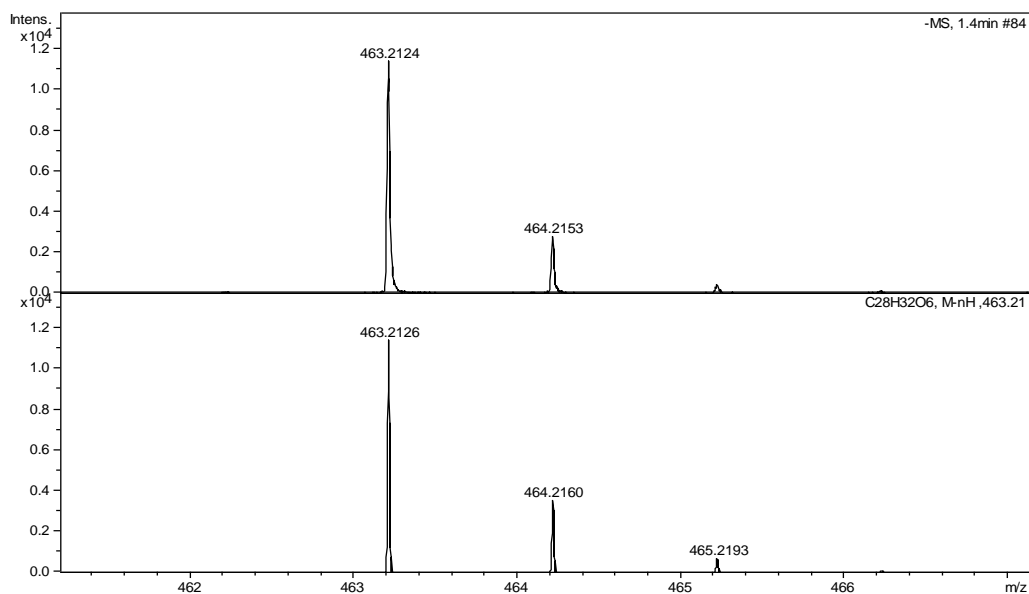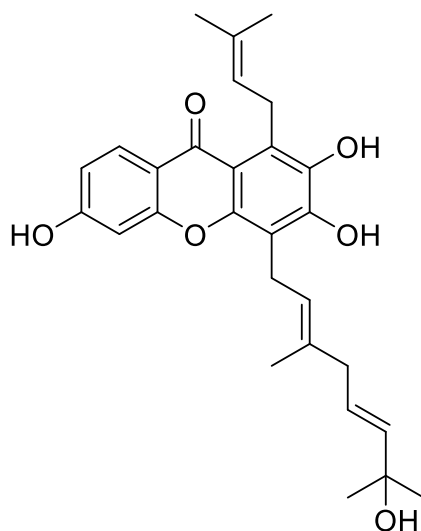

Chemical Formula:  $C_{28}H_{32}O_6$

Exact Mass: 464.2199

Molecular Weight: 464.5580

**463.2124 (Calcd. for  $C_{28}H_{31}O_6^-$  463.2126)**

Figure S5. ESI-TOF-MS spectrum of compound **16**.

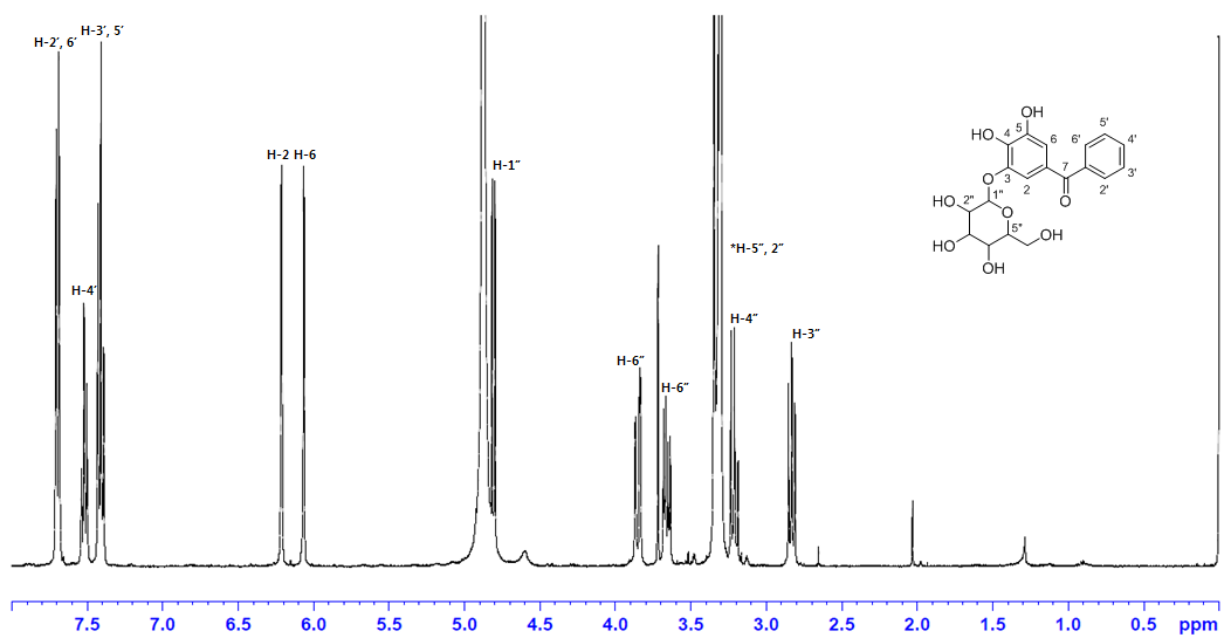

Figure S6.  $^1\text{H}$  NMR spectrum of compound **19** (methanol- $d_4$ , 400 MHz)

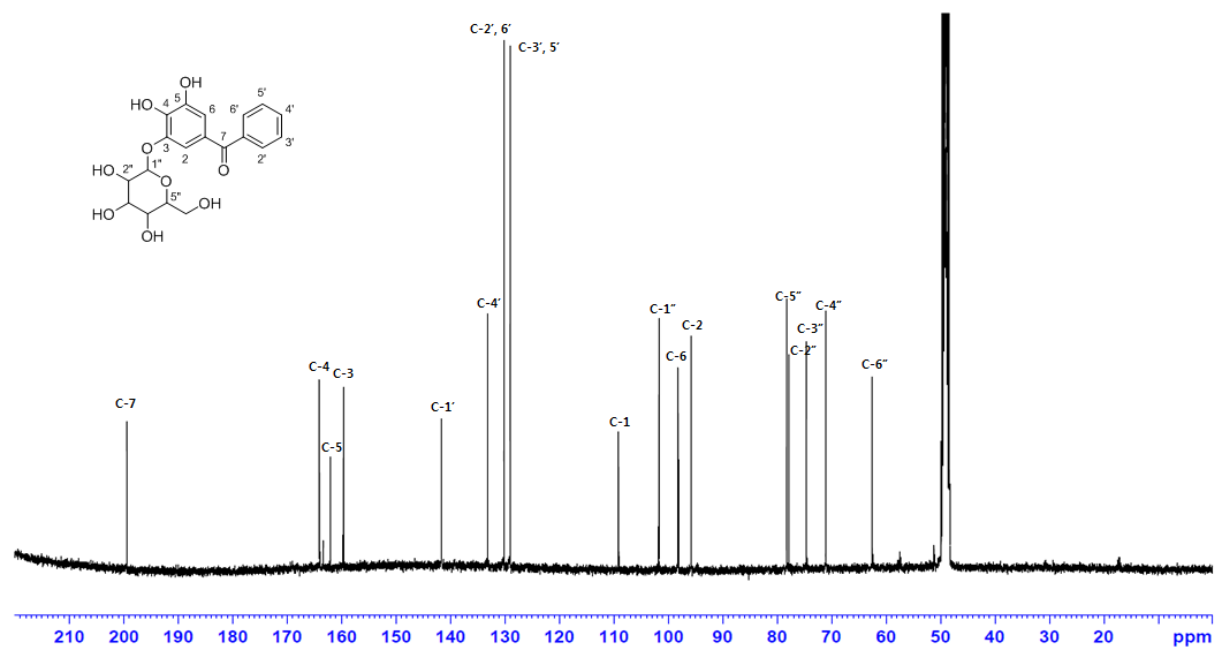

Figure S7.  $^{13}\text{C}$  NMR spectrum of compound **19** (methanol- $d_4$ , 100 MHz)

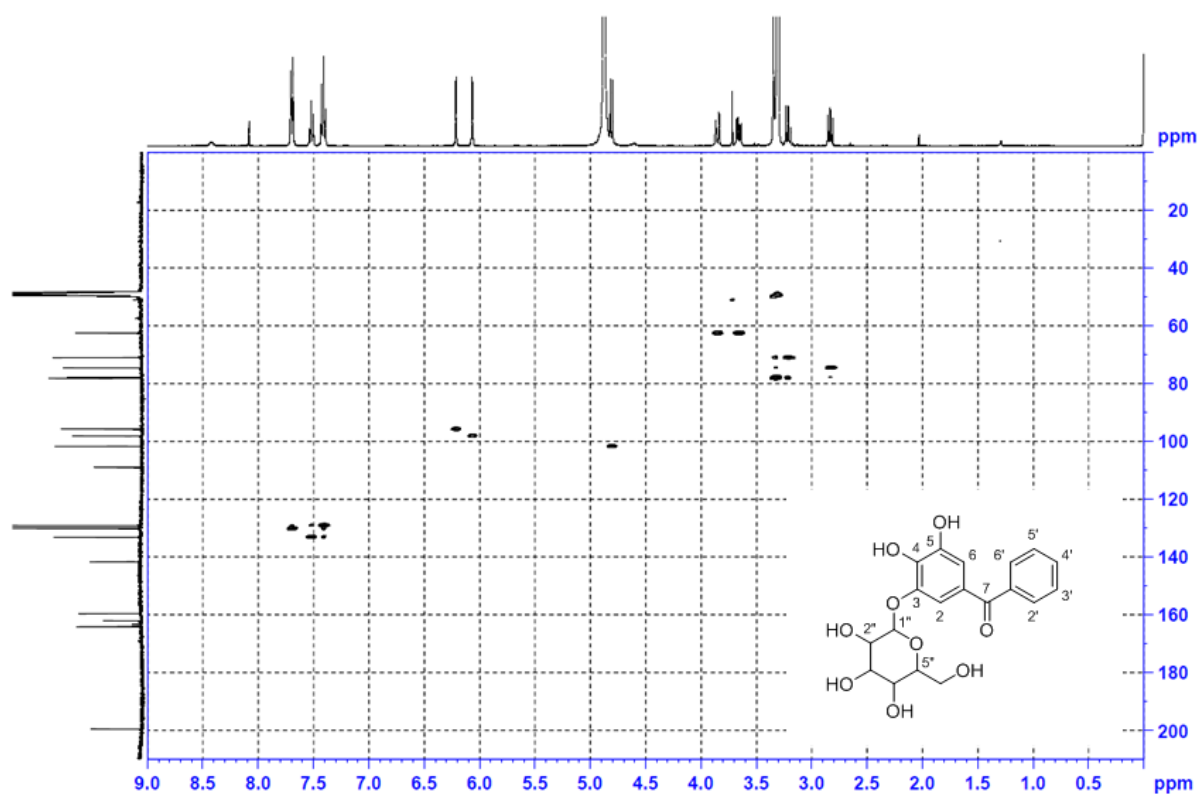

Figure S8. HSQC spectrum of compound **19**.

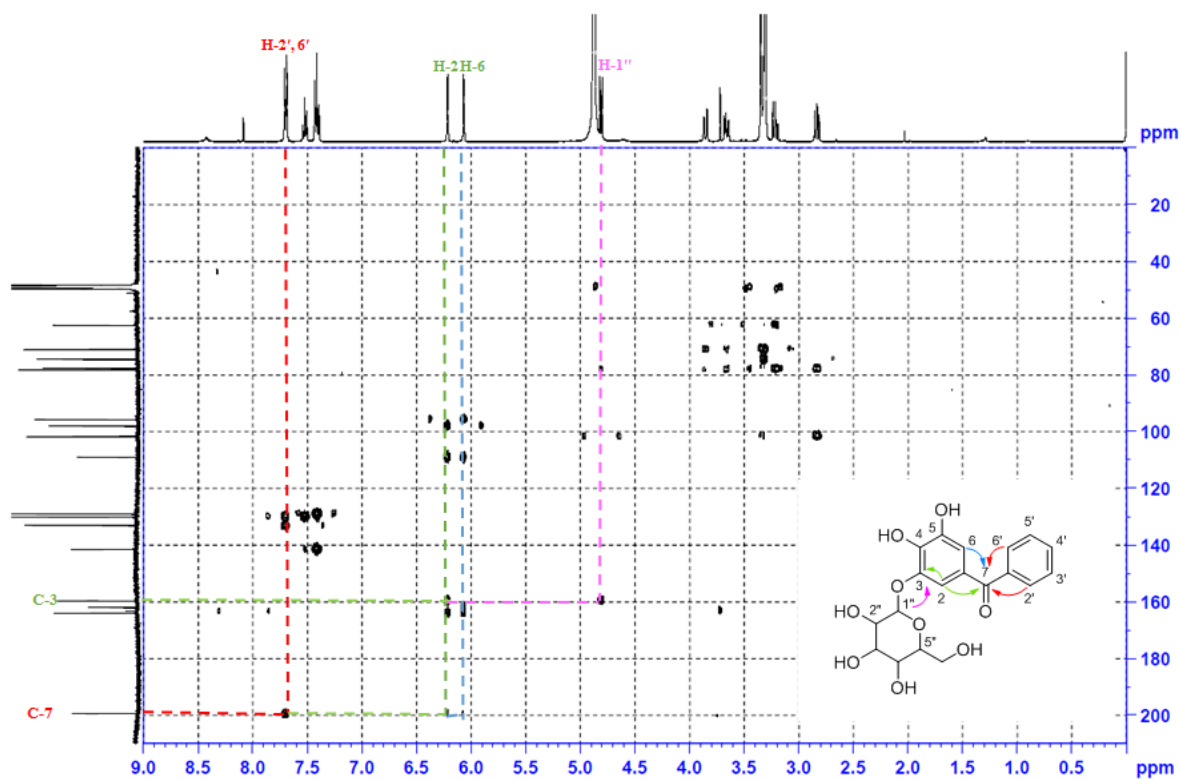

Figure S9. HMBC spectrum of compound **19**.

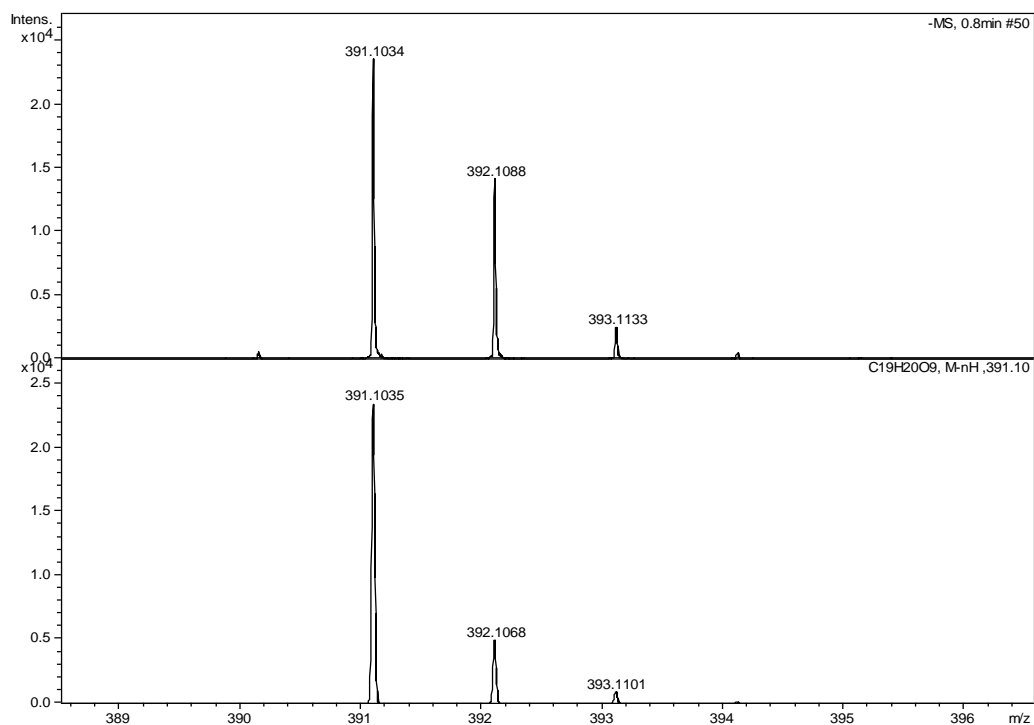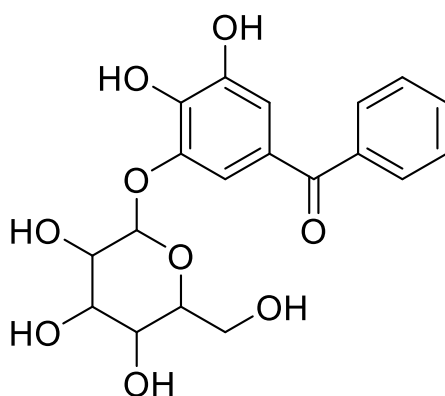

Chemical Formula: C<sub>19</sub>H<sub>20</sub>O<sub>9</sub>

Exact Mass: 392.1107

Molecular Weight: 392.3600

**391.1034(calcd. for C<sub>19</sub>H<sub>19</sub>O<sub>9</sub><sup>-</sup> 391.1035)**

Figure S10. ESI-TOF-MS spectrum of compound **19**.
